# Supplementary figures and images for: Importance of Pre-Storm Morphological Factors in Determination of Coastal Highway Vulnerability
Source: MDPI journal article supplement (doi:10.3390/jmse10081158), 2022-08-21

Supplementary Materials: Correlation matrices for storms events 2 to 7:

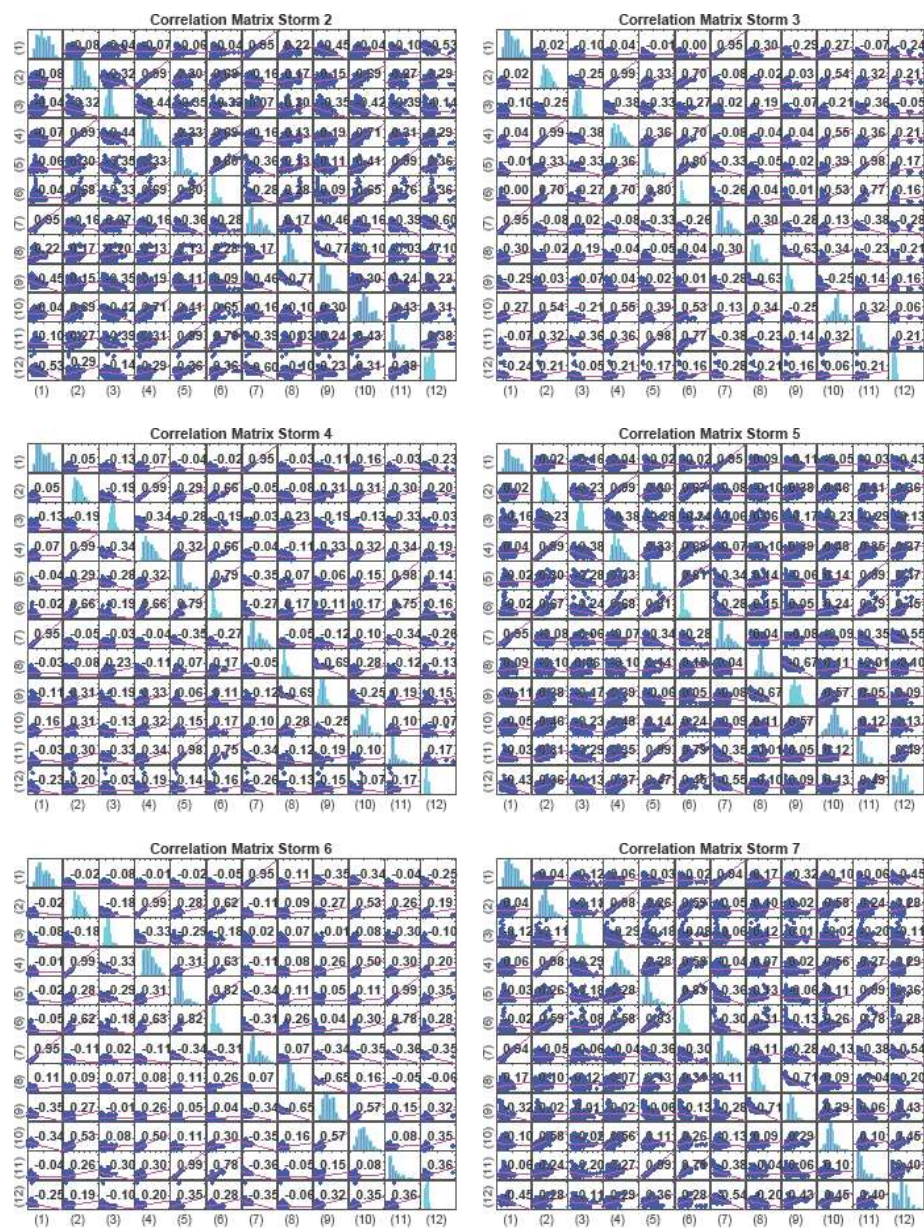

Supplement: s1 [file s1]
